# Supplementary material for: Predicting Psychosocial Health of Children and Adolescents with Obesity in Germany: The Underappreciated Role of Physical Fitness
Source: MDPI journal article supplement (doi:10.3390/ijerph182111188), 2021-10-25
Supplement: s1 [file s1]

Table S1. Baseline Multivariable Linear Regression Models

| Variables                                    |                 | HRQOL          | Scholastic Competence <sup>o</sup> | Social Competence <sup>o</sup> | Physical Appearance <sup>o</sup> | Behavioral Conduct <sup>o</sup> | Global Self-Worth <sup>o</sup> |
|----------------------------------------------|-----------------|----------------|------------------------------------|--------------------------------|----------------------------------|---------------------------------|--------------------------------|
|                                              |                 | <i>n</i> =136  | <i>n</i> =136                      | <i>n</i> =136                  | <i>n</i> =136                    | <i>n</i> =136                   | <i>n</i> =136                  |
| Age (years)                                  | $\beta$ (s.e.)  | -0.509 (6.458) | -0.628 (7.192)                     | -0.539 (8.267)                 | -1.015 (6.834)                   | -0.733 (0.7508)                 | -1.465 (7.705)                 |
|                                              | <i>p</i> -value | 0.562          | 0.485                              | 0.551                          | 0.223                            | 0.412                           | 0.104                          |
| Age squared (years)                          | $\beta$ (s.e.)  | 0.529 (0.264)  | 0.482 (0.291)                      | 0.507 (0.335)                  | 0.749 (0.277)                    | 0.612 (0.304)                   | 1.282 (0.312)                  |
|                                              | <i>p</i> -value | 0.546          | 0.590                              | 0.574                          | 0.327                            | 0.492                           | 0.153                          |
| Female <sup>a</sup>                          | $\beta$ (s.e.)  | -0.149 (2.533) | -0.090 (2.789)                     | 0.087 (3.205)                  | -0.083 (2.650)                   | -0.049 (2.911)                  | -0.024 (2.987)                 |
|                                              | <i>p</i> -value | 0.092          | 0.321                              | 0.341                          | 0.327                            | 0.663                           | 0.787                          |
| BMI Z-score                                  | $\beta$ (s.e.)  | -0.077 (3.585) | -0.017 (3.884)                     | 0.214 (4.465)                  | <b>-0.290 (3.691)</b>            | 0.135 (4.055)                   | -0.128 (4.161)                 |
|                                              | <i>p</i> -value | 0.495          | 0.880                              | 0.064                          | <b>0.008</b>                     | 0.234                           | 0.263                          |
| Body fat (%)                                 | $\beta$ (s.e.)  | -0.159 (0.159) | -0.003 (0.176)                     | -0.179 (0.202)                 | -0.096 (0.167)                   | -0.122 (0.184)                  | -0.027 (0.188)                 |
|                                              | <i>p</i> -value | 0.164          | 0.978                              | 0.093                          | 0.332                            | 0.244                           | 0.795                          |
| High Parental Educational Level <sup>b</sup> | $\beta$ (s.e.)  | 0.117 (2.906)  | <b>0.193 (3.098)</b>               | 0.083 (3.561)                  | 0.001 (2.944)                    | <b>0.194 (3.234)</b>            | <b>0.192 (3.319)</b>           |
|                                              | <i>p</i> -value | 0.206          | <b>0.039</b>                       | 0.371                          | 0.992                            | <b>0.037</b>                    | <b>0.040</b>                   |
| German/No Migration Background <sup>c</sup>  | $\beta$ (s.e.)  | -0.067 (4.054) | -0.062 (4.373)                     | -0.043 (5.027)                 | -0.064 (4.155)                   | 0.157 (4.565)                   | 0.019 (4.685)                  |
|                                              | <i>p</i> -value | 0.436          | 0.475                              | 0.620                          | 0.431                            | 0.070                           | 0.828                          |
| Relative Physical fitness (W/kg)             | $\beta$ (s.e.)  | 0.128 (3.750)  | 0.199 (4.012)                      | 0.197 (4.612)                  | -0.041 (3.812)                   | 0.134 (4.189)                   | 0.034 (4.298)                  |
|                                              | <i>p</i> -value | 0.209          | 0.055                              | 0.059                          | 0.671                            | 0.193                           | 0.742                          |
| Physical Activity (hours/day)                | $\beta$ (s.e.)  | -0.086 (0.318) | -0.058 (0.341)                     | 0.065 (0.392)                  | <b>-0.182 (0.324)</b>            | -0.040 (0.356)                  | -0.048 (0.365)                 |
|                                              | <i>p</i> -value | 0.334          | 0.526                              | 0.479                          | <b>0.035</b>                     | 0.663                           | 0.601                          |
| Media Consumption (hours/day)                | $\beta$ (s.e.)  | -0.113 (0.103) | 0.011 (0.109)                      | -0.127 (0.126)                 | -0.122 (0.104)                   | -0.097 (0.114)                  | -0.022 (0.117)                 |
|                                              | <i>p</i> -value | 0.220          | 0.910                              | 0.177                          | 0.164                            | 0.297                           | 0.811                          |
| R <sup>2</sup>                               |                 | <b>0.134</b>   | 0.114                              | 0.103                          | <b>0.218</b>                     | 0.122                           | 0.114                          |
| Adj. R <sup>2</sup>                          |                 | <b>0.065</b>   | 0.043                              | 0.031                          | <b>0.156</b>                     | 0.052                           | 0.043                          |
| Final Model <i>p</i> -value                  |                 | <b>0.045</b>   | 0.113                              | 0.175                          | <b>&lt;0.001</b>                 | 0.078                           | 0.111                          |

HRQOL, Health-Related Quality of Life;  $\beta$ , Standardized Coefficient Beta; s.e., Standard Error; Adj, Adjusted; °Subdomains of self-concept; Reference Categories: <sup>a</sup> Male, <sup>b</sup> low parental educational level (only one parent/neither mother nor father have completed secondary school/*Abitur*), <sup>c</sup> Non-German; Significance set at  $p < 0.05$ ; Significant values in bold
